# Supplementary material for: A role for the Smc3 hinge domain in the maintenance of sister chromatid cohesion
Source: PubMed Central journal article supplement — Mol Biol Cell. 2018 Feb 1;29(3):339–55. doi: 10.1091/mbc.E17-08-0511 (PMC5996953; doi:10.1091/mbc.e17-08-0511), 2018-02-01
Supplement: mbc-29-339-s001.pdf [file mbc-29-339-s001.pdf]

# Supplemental Materials

*Molecular Biology of the Cell*

Robison et al.

# Supplementary Figure 1

## A

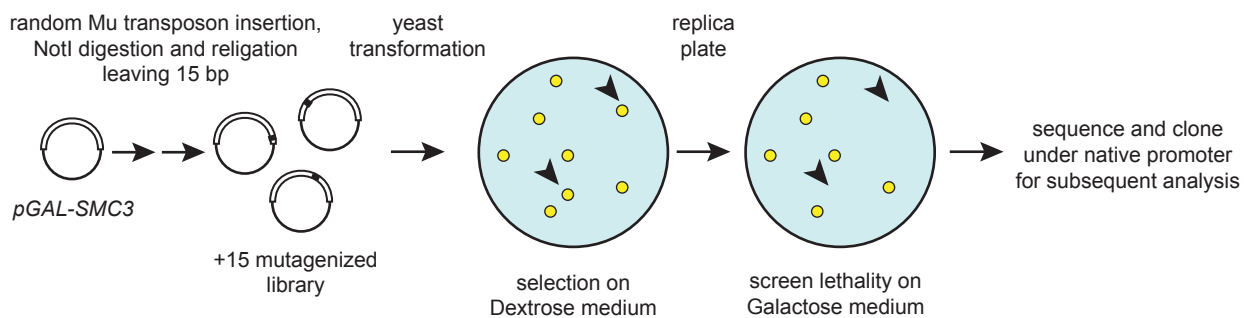

## B

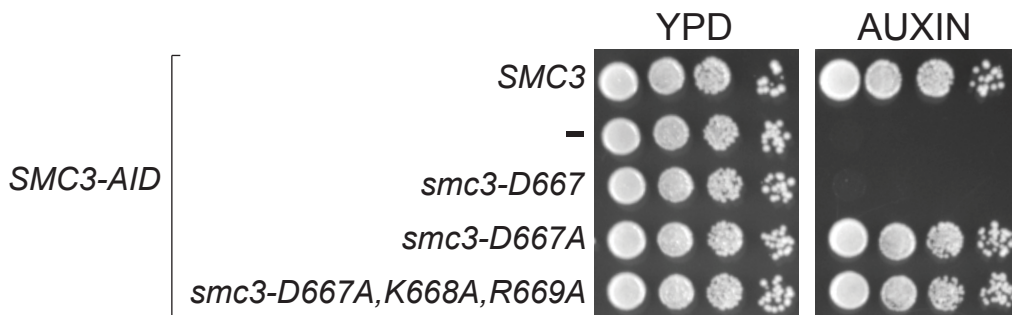

## Supplementary Figure 2

**A.**

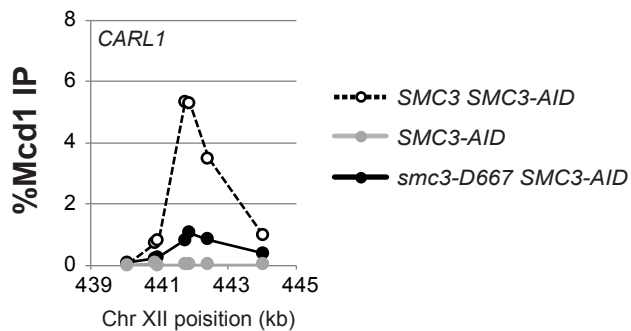

**B.**

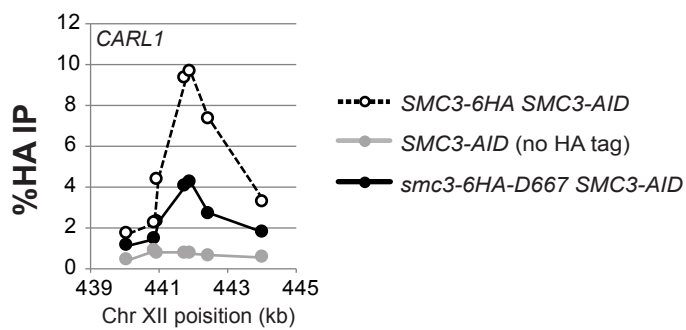

# Supplementary Figure 3

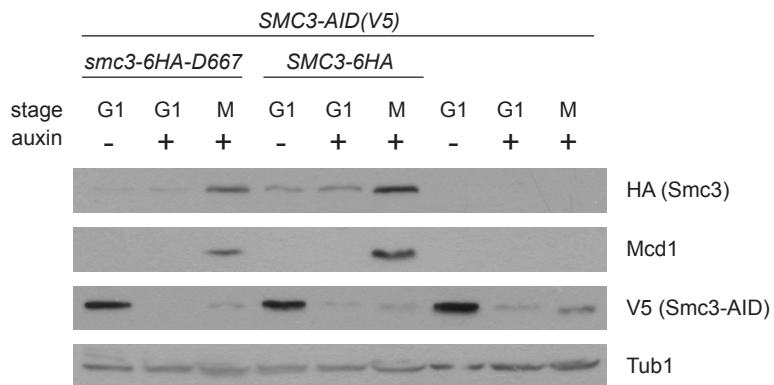

# Supplementary Figure 4

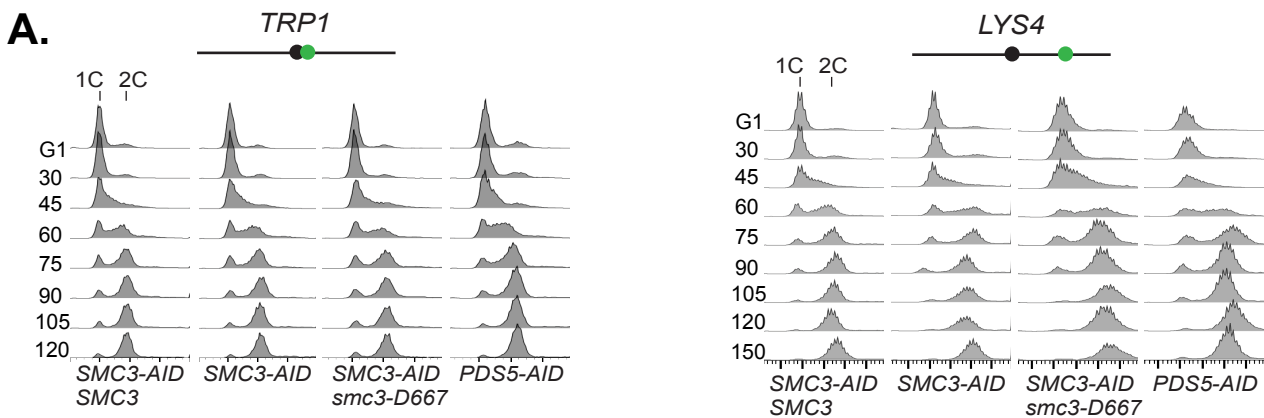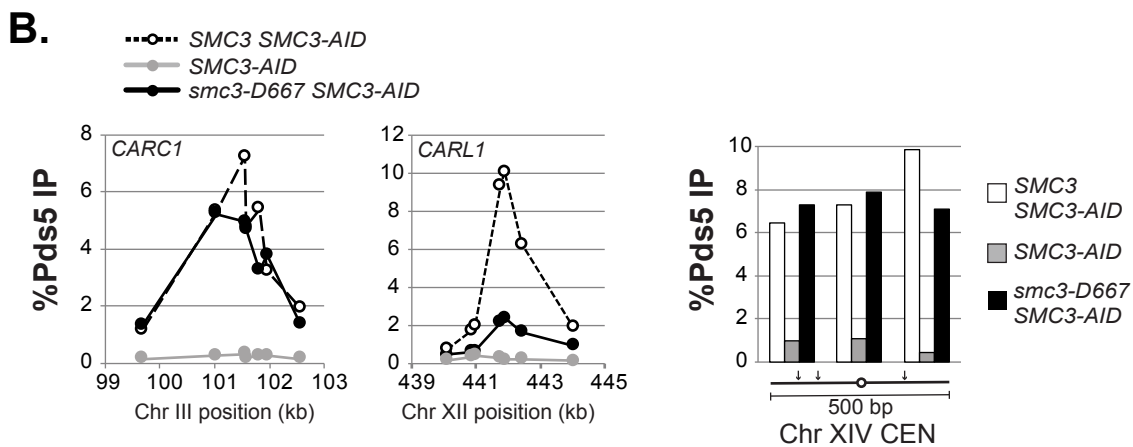

# Supplementary Figure 5

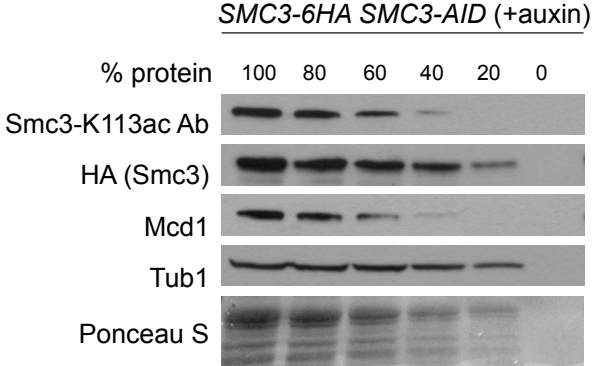

# Supplementary Figure 6

Smc3 RID positions

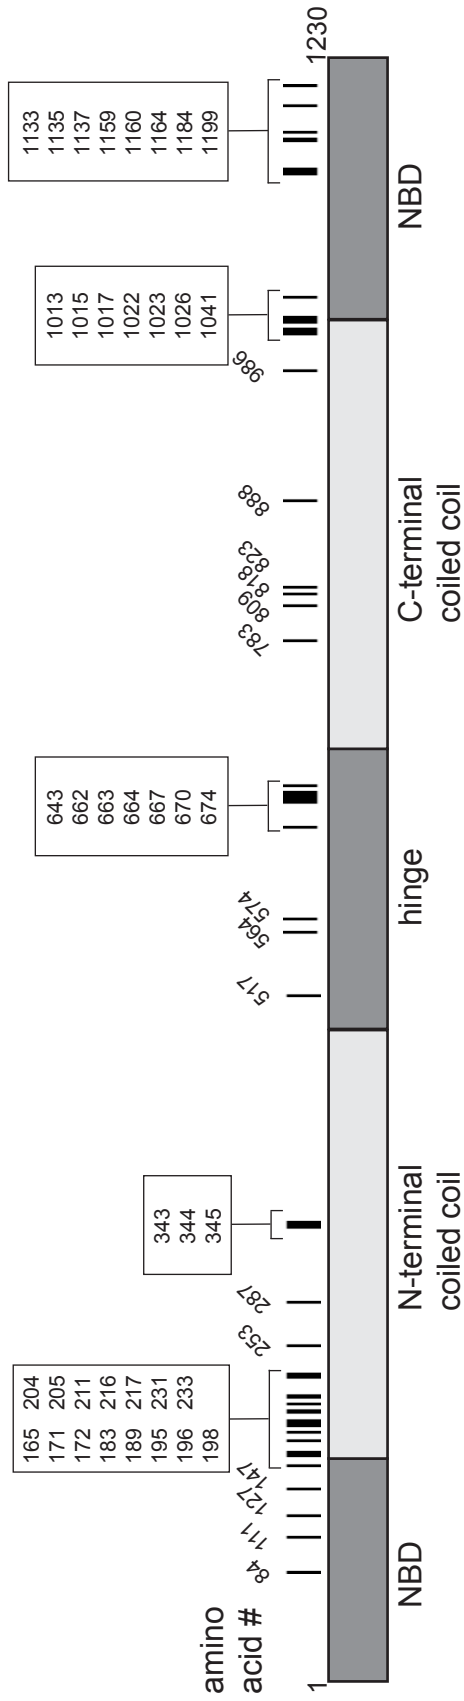

Supplementary Table 1

| <b>Location</b> | <b>Insertion</b> | <b>Viability 5-FOA 23°C</b> |
|-----------------|------------------|-----------------------------|
| D84             | CGRND            | Not Tested (NT)             |
| D127            | AAAGD            | -                           |
| P147            | LRPQP            | -                           |
| L165            | RPQQL            | +                           |
| G171            | AAAAG            | -                           |
| N204            | AAALN            | -                           |
| Y253            | NAAAY            | +                           |
| S343            | IAAAS            | -                           |
| N517            | RPQAN            | +                           |
| D643            | CGRKD            | +                           |
| K1023           | VRPHK            | -                           |
| Y1164           | CGRKY            | NT                          |



Supplementary Table 2

| Location | Insertion | Viability on 5-FOA 23°C |
|----------|-----------|-------------------------|
| L111     | NAAAL     | -                       |
| G171     | CGRIG     | -                       |
| A172     | AAVGA     | -                       |
| L183     | MRPQL     | -                       |
| L183     | RPHSL     | Not Tested (NT)         |
| T189     | DAAAT     | -                       |
| Q195     | IAAAQ     | -                       |
| I196     | AAAQI     | -                       |
| K198     | DAAAK     | -                       |
| S205     | AALNS     | -                       |
| E211     | AAAME     | -                       |
| E216     | FAAAE     | -                       |
| L217     | DAAAL     | -                       |
| L217     | VRPQL     | NT                      |
| Q231     | CGRNQ     | -                       |
| T233     | AAAFT     | -                       |
| L287     | RPHSL     | +                       |
| I345     | AAAIL     | -                       |
| Q347     | MRPQQ     | -                       |
| Q347     | SAAAQ     | NT                      |
| H564     | CGRIH     | +                       |
| T574     | AAAAT     | -                       |
| D662     | AAALD     | NT                      |
| G663     | AAADG     | NT                      |
| D664     | AAAGD     | -                       |
| D667     | AAAAD     | -                       |
| G670     | AAARD     | NT                      |
| G670     | CGRRG     | -                       |
| G674     | CGRTG     | +                       |
| N783     | AAALN     | +                       |
| T809     | MRPQT     | +                       |
| K818     | CGRNK     | +                       |
| S823     | VRPQS     | +                       |
| V888     | FAAAV     | -                       |
| T986     | DAAAT     | +                       |
| A1013    | DAAAA     | -                       |
| R1015    | VRPQR     | -                       |
| S1017    | VRPHS     | -                       |
| S1022    | NAAAS     | -                       |
| K1023    | CGRTK     | NT                      |
| I1026    | HAAAI     | NT                      |
| V1041    | AAAIV     | -                       |
| V1133    | RPQTV     | NT                      |
| A1135    | RPQCA     | -                       |
| A1137    | AAAIA     | NT                      |
| A1159    | CGRTA     | NT                      |
| L1160    | RPHAL     | NT                      |
| T1184    | MRPHT     | -                       |
| R1199    | VRPHR     | -                       |
